# Supplementary material
Source: PubMed Central journal article supplement (PMC4677894)
Supplement: supp_pp.15.01005_PP2015-01005R2_Supplemental_Materialfigs.pdf [file supp_pp.15.01005_PP2015-01005R2_Supplemental_Materialfigs.pdf]

**Figure S1**

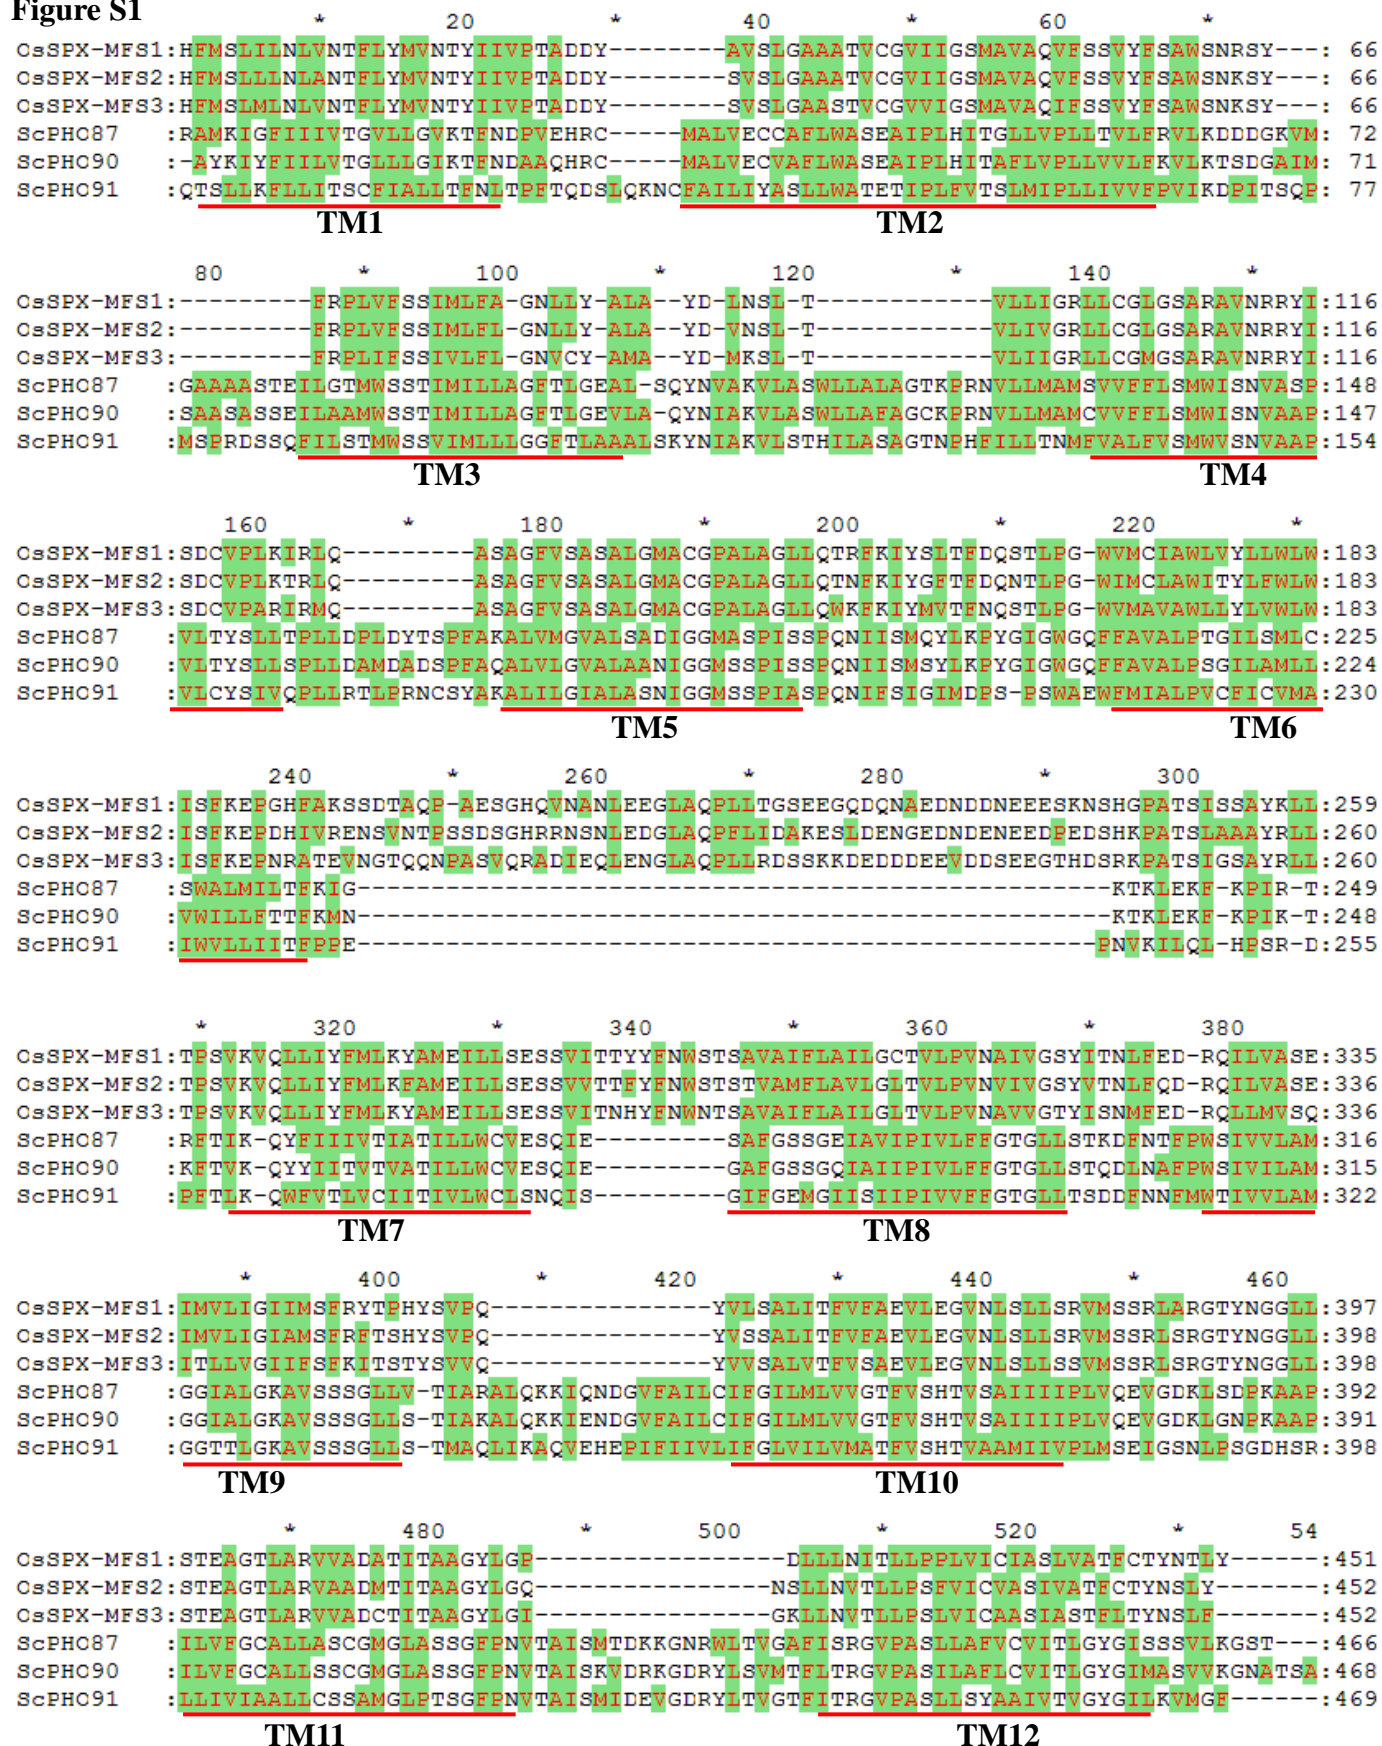

**Figure S1.** Multiple sequence alignment between OsSPX-MFS genes and ScPHO87, ScPHO90 and ScPHO91. The hydrophobic amino acids were marked red. The conserve transmembrane domain were indicated by red lines.

**Figure S2**

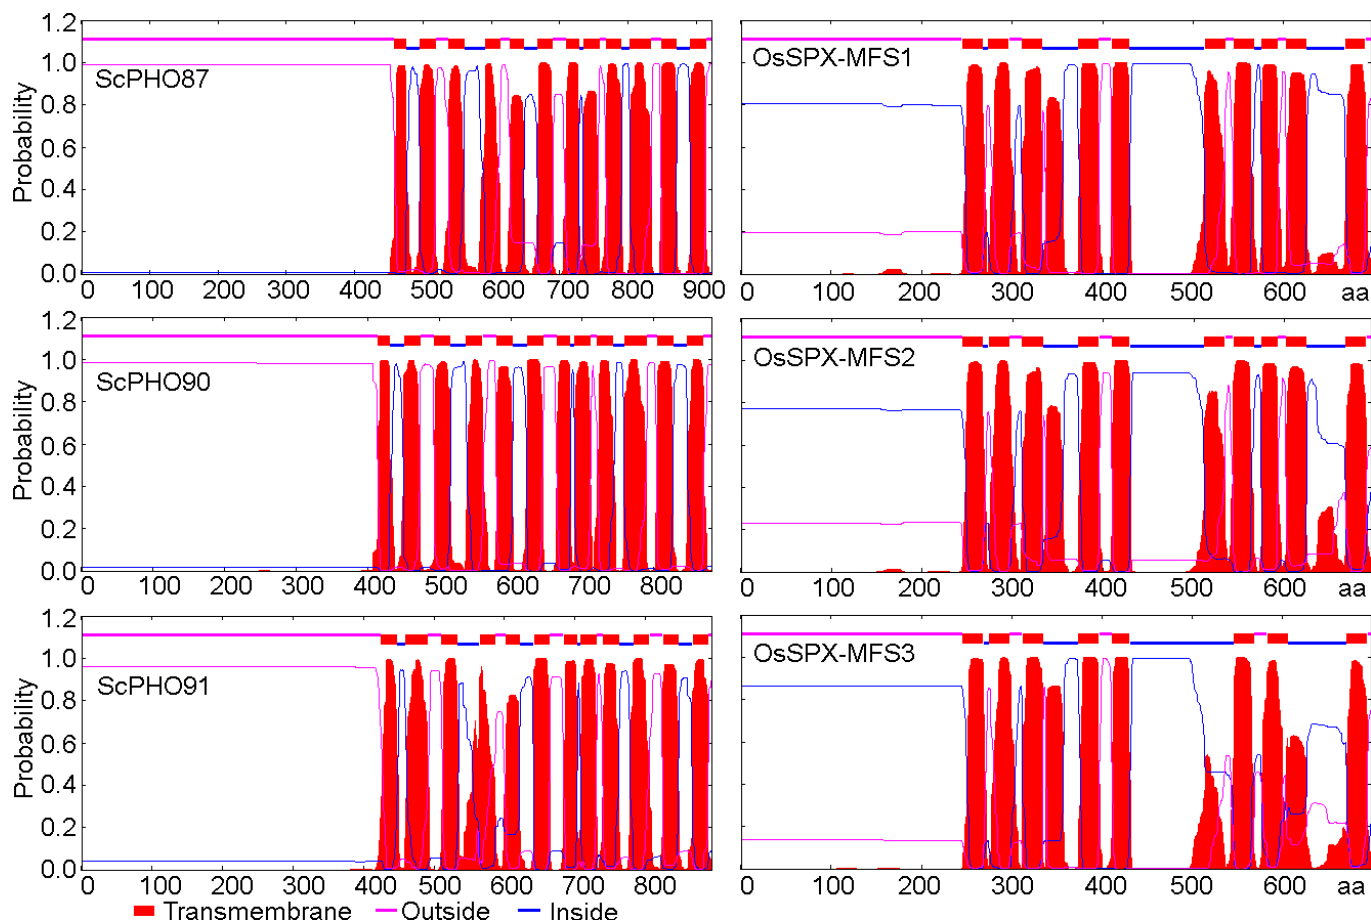

**Figure S2. Prediction of transmembrane helices of OsSPX-MFS, ScPHO87, ScPHO90 and ScPHO91 proteins by TMHMM (<http://www.cbs.dtu.dk/services/TMHMM/>).**

**Figure S3**

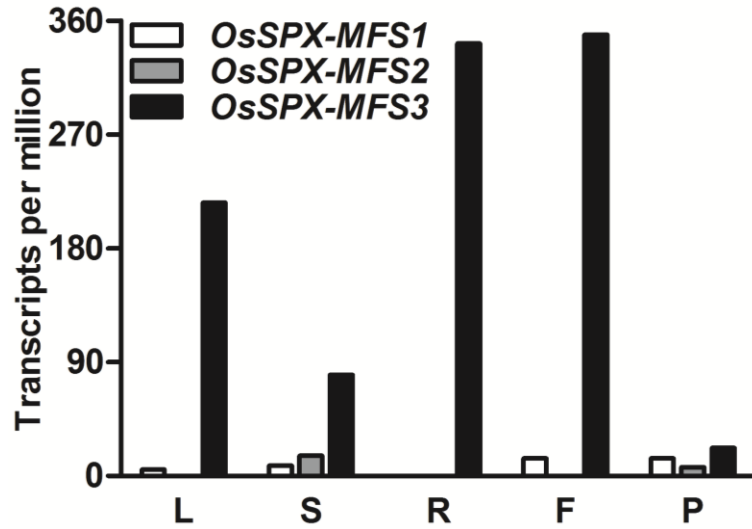

**Figure S3. Digital expression analysis of *OsSPX-MFS1*, *OsSPX-MFS2* and *OsSPX-MFS3* in different tissues in rice. L, leaf; S, shoot; R, root; F, flower; P, panicle. Digital expression was performed using the rice dbEST database. Frequencies of the ESTs in the corresponding library were calculated to represent the gene expression level.**

**Figure S4**

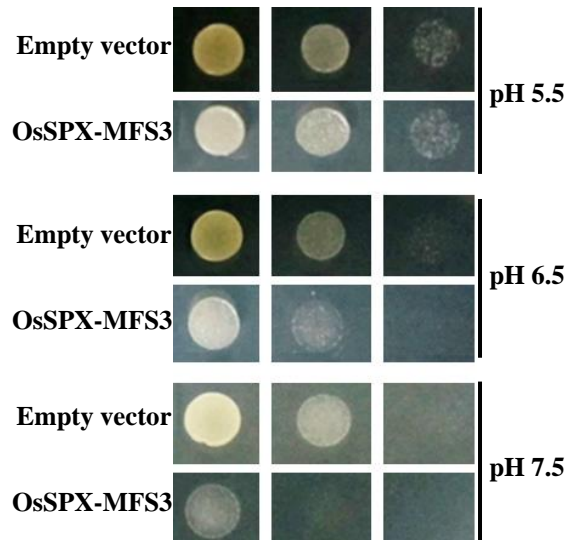

**Figure S4. Complementation of yeast high affinity inorganic phosphate transporter mutant PAM2 ( $\Delta pho84\Delta pho89$ ) by OsSPX-MFS3 genes at different pH conditions.** Yeast PAM2 cells harboring either an empty expression vector (control) or OsSPX-MFS3 cDNA construct were grown in SD medium containing 0.22 mM Pi at pH 4.5 to an OD600 = 1. Equal volumes of 10-fold serial dilutions were applied to medium containing 1 mM Pi and then incubated at 30°C for 4 days.

**Figure S5**

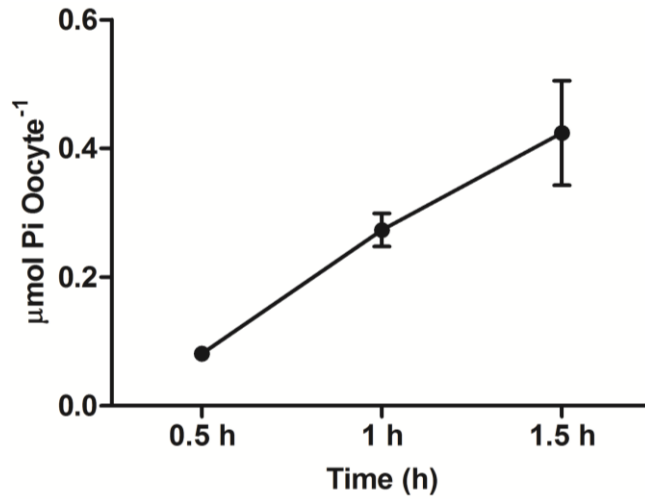

**Figure S5. Time course of phosphate influx activity of OsSPX-MFS3.** Oocytes were incubated for 48 h in BS (without phosphate) and then transferred into BS solution containing 5 mM Pi for 1 hour containing  $^{33}\text{P}$  (5 mCi/ml). The radioactivity response to increasing concentrations of externally applied Pi was recorded at pH 5.5. Mean  $\pm$  SEM (n = 8 oocytes) are shown.

**Figure S6**

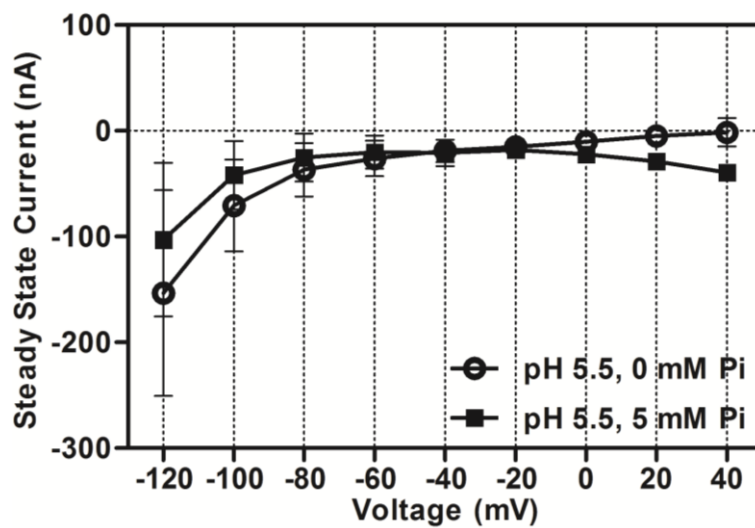

**Figure S6 Voltage clamp of OsSPX-MFS3 injected oocyte under 0 Pi and 5 mM Pi solution.**
